# Supplementary material for: Mapping the protonation states of the histidine brace in an AA10 lytic polysaccharide monooxygenase using CW-EPR spectroscopy and DFT calculations
Source: Royal Society of Chemistry journal article supplement (doi:10.1039/d1fd00068c), 2021-11-04
Supplement: d1fd00068c1.pdf [file d1fd00068c1.pdf]

# Supplementary Information

## Contents

|                                                                                                                          |           |
|--------------------------------------------------------------------------------------------------------------------------|-----------|
| <b>Figure S1. SDS PAGE Electrophoresis of <i>B/AA10</i> enzyme.....</b>                                                  | <b>2</b>  |
| <b>Figure S2 Spin quantification by double-integration of EPR spectra of <i>B/AA10</i> collected at varying pH. ....</b> | <b>3</b>  |
| <b>Table S1. Singular Values obtained from SVD analysis of the pH titration EPR spectra .....</b>                        | <b>4</b>  |
| <b>Figure S3. Singular Value Decomposition (SVD) abstract EPR spectra .....</b>                                          | <b>5</b>  |
| <b>Figure S4. pH titration speciation plot .....</b>                                                                     | <b>6</b>  |
| <b>Figure S5 pH titration regression analysis to determine pKa1 and proton stoichiometry .....</b>                       | <b>7</b>  |
| <b>Figure S6. UV-Visible spectrum of <i>B/AA10</i> (ca. 10 <math>\mu</math>M) at pH 12.5.....</b>                        | <b>8</b>  |
| <b>DFT Geometry optimisations.....</b>                                                                                   | <b>9</b>  |
| <b>Figure S7. DFT model used to describe species 1.....</b>                                                              | <b>10</b> |
| <b>Figure S8. Comparison on the DFT optimised coordinates of model 1 against the crystallographic coordinates .....</b>  | <b>11</b> |
| <b>DFT EPR property calculations.....</b>                                                                                | <b>11</b> |
| <b>Time Dependent-DFT (TD-DFT).....</b>                                                                                  | <b>13</b> |
| <b>DFT cartesian coordinates .....</b>                                                                                   | <b>14</b> |
| <b>References.....</b>                                                                                                   | <b>21</b> |

lane 1 2 3 4 5 6 7

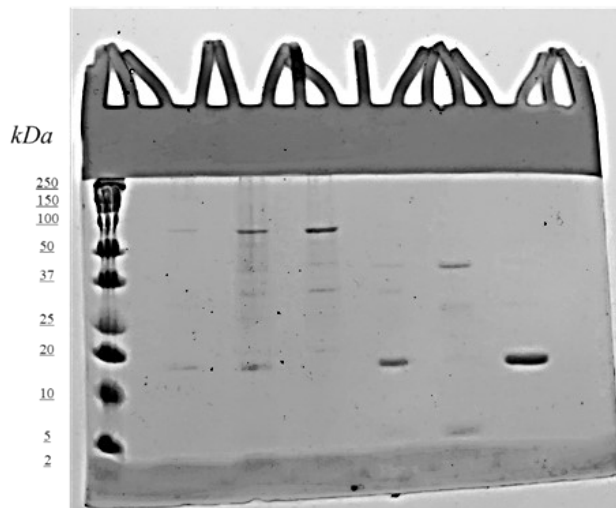

Samples:

- 1) Biorad molecular marker
- 2) Supernatant in spheroplast buffer
- 3) Supernatant in MQ H<sub>2</sub>O
- 4) Flow-through from anion exchange column
- 5) Crude protein fractions from anion exchange column
- 6) First peak from SEC
- 7) Pure *B/AA10* – second peak in SEC

Figure S1. SDS PAGE Electrophoresis of *B/AA10* enzyme.

Gel electrophoresis was carried out using a 12% SDS-PAGE gel to confirm purity of *B/AA10* enzyme (lane 7) showing single band slightly under 20 kDa.

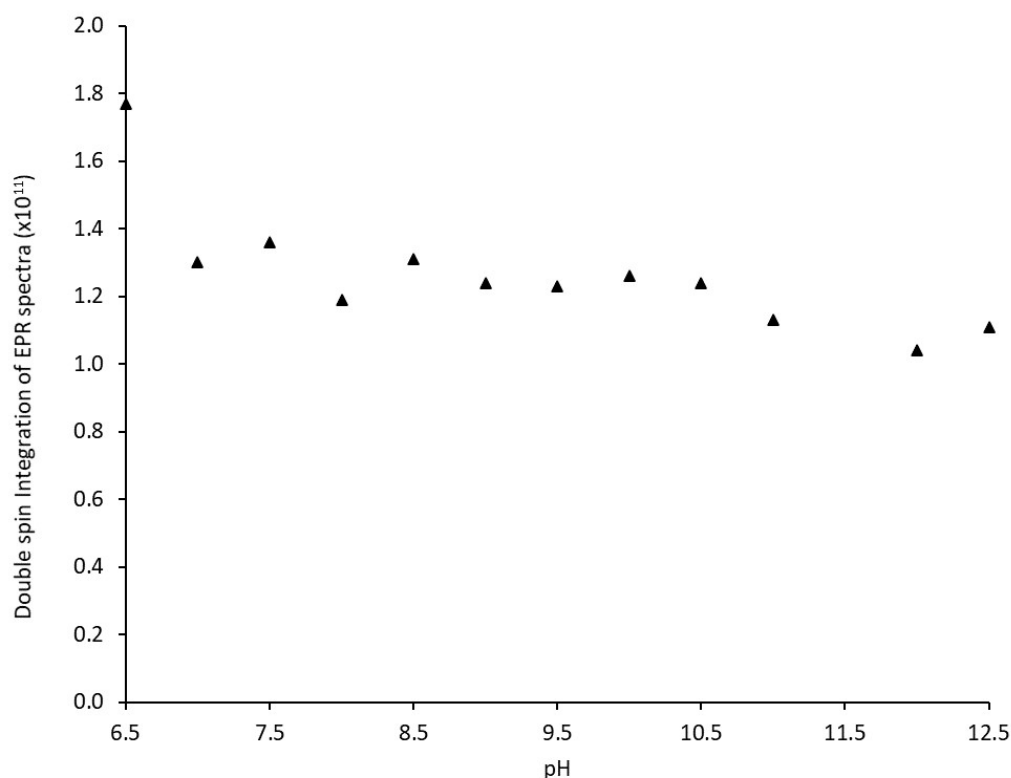

Figure S2 Spin quantification by double-integration of EPR spectra of *B/AA10* collected at varying pH.

The first derivative spectra were integrated twice with the maximum value of the resulting curve reporting on the total area under each absorption spectrum. Experimental conditions (such as microwave power) can affect signal intensity and as such were fixed between experiments. However, other factors such as slightly differing sample alignment in the EPR cavity along with variations in concentration due to altering pH were not able to be controlled for introducing some uncertainty in these values. Notwithstanding these caveats, however, the data shows a relatively consistent double-integration spin quantification (albeit with a slight downward trend likely due to diluting samples slightly with NaOH with increasing pH) indicating no redox processes occurred throughout the experiment.

Table S1. Singular Values obtained from SVD analysis of the pH titration EPR spectra

| Principal Component | Singular Value |
|---------------------|----------------|
| 1                   | 59             |
| 2                   | 20             |
| 3                   | 10             |

Singular Value Decomposition (SVD) was carried out in MATLAB R2020a by importing the EPR pH titration data set as a matrix (A) using the function:

$$A = \begin{bmatrix} a & \cdots & b \\ \vdots & \ddots & \vdots \\ y & \cdots & z \end{bmatrix}$$

Whereby the dataset is copied inside the square brackets.

A series of singular values were obtained using the functions:

$$s = \text{svd}(A)$$

$$[U, S, V] = \text{svd}(A)$$

The latter performs a singular value decomposition of matrix A, such that  $A = U \times S \times V'$ . It was possible to obtain abstract spectra from the U ( $m \times m$ ) matrix by the function:

$$G = U(1:m, n)$$

Where G contains the generated abstract spectrum, m is the rank of the U matrix (in this case 1024 due to the selected scan width of the EPR spectrum) and n is the selected principal component (in this case 1-3).

From the SVD analysis, three large non-zero singular values were obtained (Table S1) with their corresponding abstract spectra containing relatively little noise. In the absence of noiseless data, other non-zero singular values were generated. However, subsequent values were disregarded due to their comparatively small singular values and noisy abstract spectra. It was determined that there were 3 major principal components within the dataset.

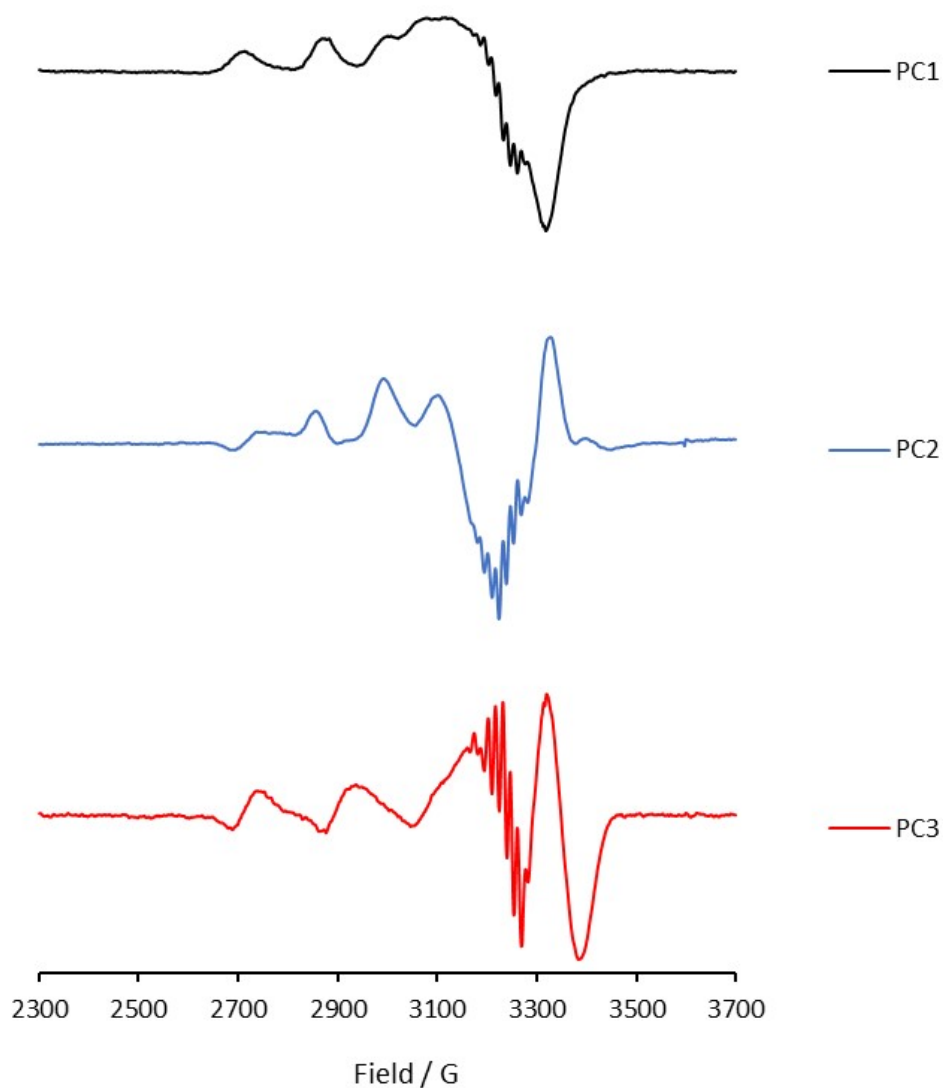

Figure S3. Singular Value Decomposition (SVD) abstract EPR spectra of the three large principal components.

PC3 (red) appears to somewhat resemble species **3** formed at high pH notable by the low field hyperfine peaks and overshoot feature. However, the abstract spectra of both PC1 and PC2 do not seem to match the spectra obtained for species **1** & **2** suggesting the SVD analysis struggled to separate these two species. This would likely improve with increasing number of data sets by performing the pH titration with smaller incremental steps.

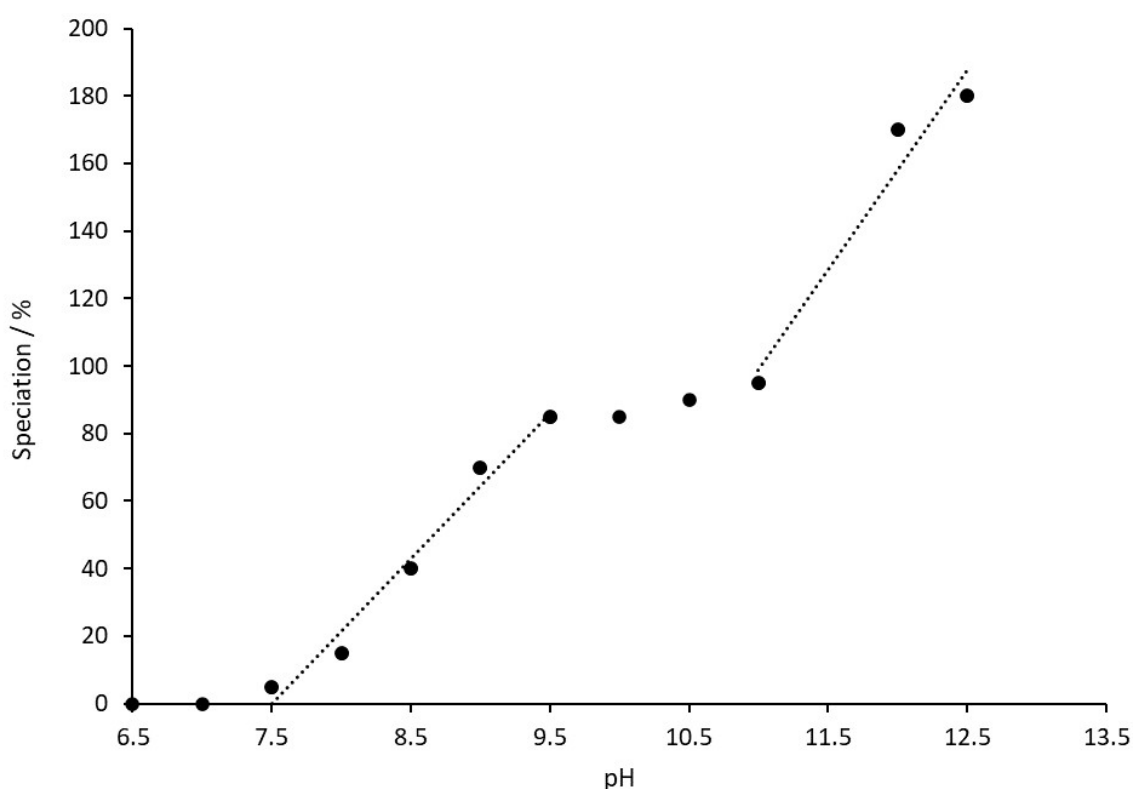

Figure S4. pH titration speciation plot. Speciation determined by comparative weighting of each species within the EPR spectra ranging from pH 6.5-12.5 with 0% representing all species 1, 100% being all species 2, and 200% being all species 3.

The speciation of the sample at each pH value was determined by assuming the spectrum collected at pH 6.5 describes 100% species 1. Each spectrum was intensity-normalised to a maximum value of 1, to remove error from sample-cavity alignment between experiment and the slightly varying sample concentration from adjusting the pH. A percentage of the intensity of species 1 was then subtracted from each 'mixed' EPR spectrum and to determine the relative ratio of species 1: species 2. Speciation was determined when no shoulders corresponding to the 'subtracted spectrum' were present, yielding a flat baseline between peaks within the parallel region of the spectrum. By pH 10.5, there was no/negligible signal intensity corresponding to species 1 and the spectrum was assumed to be  $\approx$  100% species 2. Subsequent speciation between pH 10.5-12.5 were derived using the same method, but now by subtracting species 3 intensity from the mixed spectra assuming the spectrum at pH 12.5  $\approx$  100% species 3.

Assumptions were made on basis that each of the species at pH 6.5, 10.5 and 12.5 could be well described using a single set of spin Hamiltonian parameters in their respective simulations.

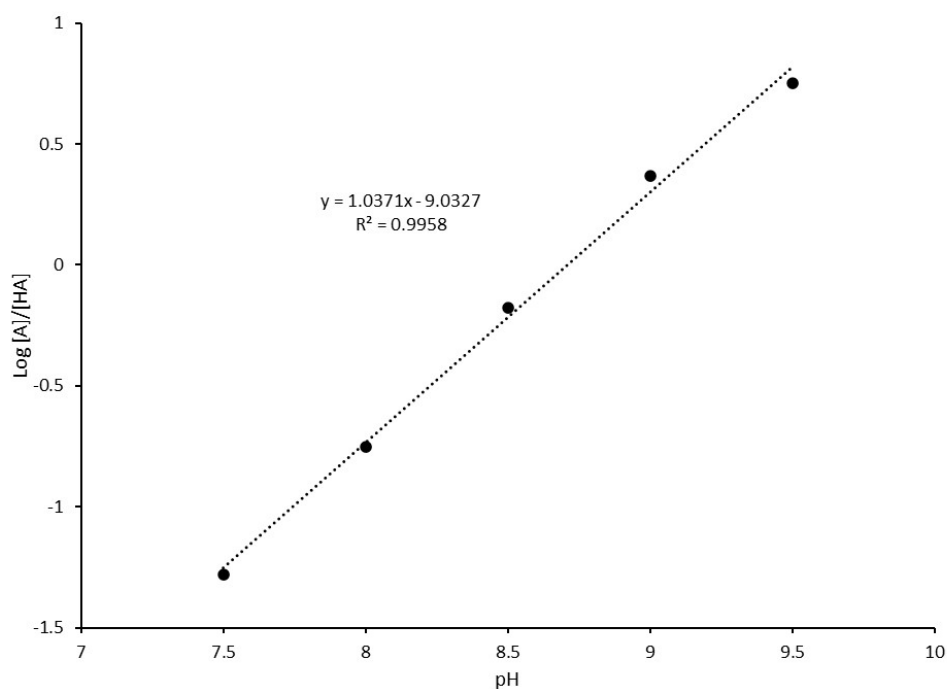

Figure S5 pH titration regression analysis to determine pKa1 and proton stoichiometry.

$$pH = pK_a - \log \frac{[A^-]}{[HA]}$$

At 50% of each species,  $-\log \frac{[A]}{[HA]} = 0, \therefore pH = pK_a$

$$\log \frac{[A^-][H^+]}{[HA]} = 1.037 \times pH - 9.033$$

At 50% of each species:

$$0 = 1.037 \times pH - 9.033$$

$$pH = pK_a = \frac{9.033}{1.037} = 8.71$$

The proton stoichiometry is reported by the gradient. Here, this is 1.037. Since the value needs to be an integer number, it was assumed a single proton was involved in the first deprotonation process.

The same process was performed on the second deprotonation step to find an approximate pKa2 of 11.5 and proton stoichiometry of 1.3. Again, this was adjudged to be a single deprotonation event. Due to the comparatively few data points in this part of the titration, the value of pKa2 is expected to carry more error than pKa1.





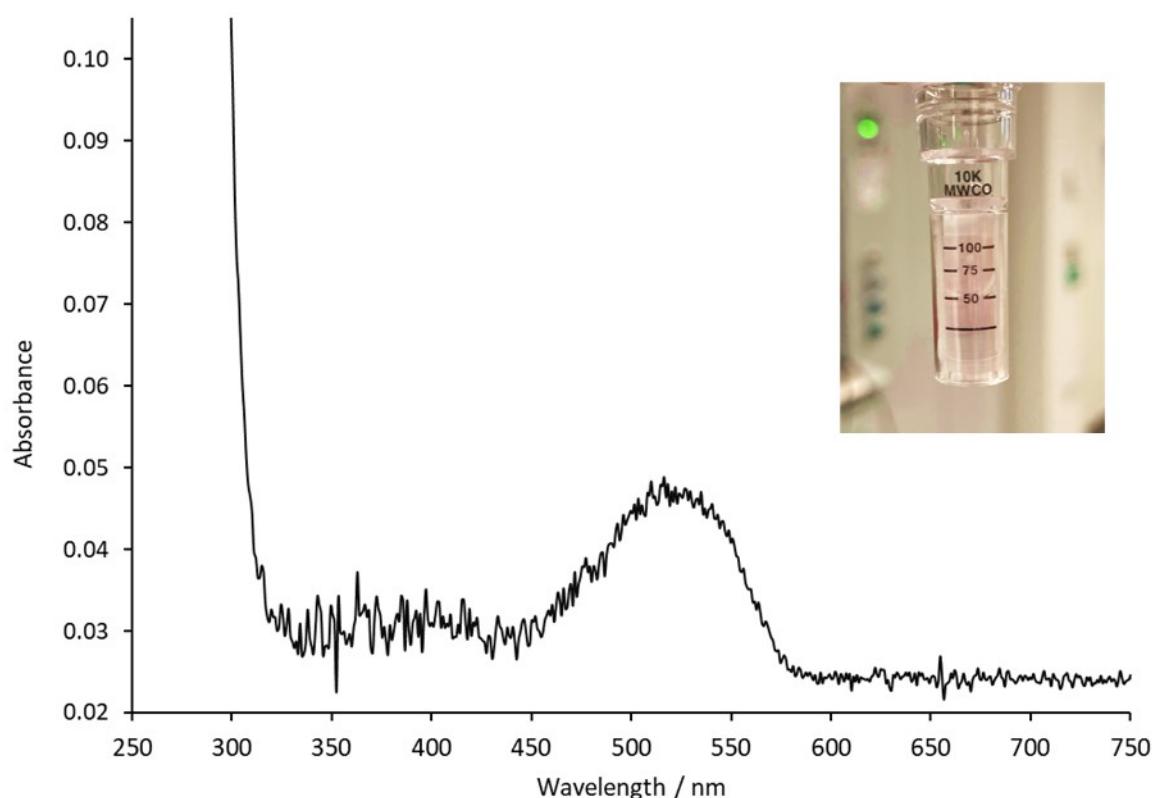

Figure S6. UV-Visible spectrum of *B/AA10* (ca. 10  $\mu\text{M}$ ) in MES, CHES, HEPES and CAPS, each at 5 mM (pH 12.5). Insert showing 10 kDa mass cut—off centrifugal filter containing *B/AA10* (ca. 10  $\mu\text{M}$ ) MES, CHES, HEPES and CAPS, each at 5 mM (pH 12.5) with a pale pink colour.

The addition of NaOH to the *B/AA10* enzyme afforded a colour change of the solution to from colourless to pale pink when approaching pH  $> 12$ . A UV/Visible spectrum was collected of *B/AA10* at a concentration of 10  $\mu\text{M}$  and pH 12.5. The absorption band centred at 520 nm has a molar absorptivity  $\varepsilon \approx 2500 \text{ M}^{-1} \text{ cm}^{-1}$ . The absorption band is centred in the cyan/green region of the electromagnetic spectrum, giving rise to a complementary colour of red/pink; in accordance with the appearance of the sample in the centrifugal concentrator.

## DFT Geometry optimisations

Initial atomic coordinates to model species **1**, **2** and **3** were generated from the crystallographic structure of the similar enzyme *BaAA10* (PDB 5IJU, resolution 1.7 Å) from the Carbohydrate-Active enZymes (CAZy) database.<sup>1</sup> In all models the crystallographic coordinates were truncated to include the Cu(II) ion and 9 residues deemed to be key in the active site geometry: His28, Glu68, Gln92, Ala123, Pro124, His125, Thr127, Trp187 and Phe196 (numbering starting at the first histidine is position 28; His 28 and His 125 are analogous to His32 and His121 in BILPMO10A). Hydrogen atoms were added to appropriate positions as were not attainable from the crystallographic coordinate file. The following modifications were made to reduce the size of the computational models, thus decreasing computational cost/time:

His28 and His125 were truncated at the carbonyl carbon, which was replaced by a methyl group, Glu68 and Gln92 were truncated with methyl substitution of the C $\gamma$ , the nitrogen of the amide bond between Ala123 and Thr122 was replaced by methyl groups, Trp187 and Phe196 were truncated with methyl substitution of the C $\beta$ , Thr127 was truncated with methyl substitution of the C $\alpha$  and the methyl group of C $\beta$  was removed. For the species **1** model, two water molecules were retained with Cu-O distances fixed to 1.9 and 2.2 Å in keeping with the crystallographic coordinates. These Cu-O constraints were lifted for models **2** and **3**. Upon optimisation, the proton attached to the water nearest the Glu side chain was deprotonated by the carboxylate group. For the species **2** model, the proton shared by the ligating hydroxide and glutamate was removed and a proton from the additional water molecule was transferred to the -NH<sub>2</sub> group. For the species **3** model, the -NH<sub>3</sub><sup>+</sup> proton was transferred back to the hydroxide and an additional proton was removed from the -NH<sub>2</sub> group, giving an -NH- (azanide) group. By significantly truncating these models, certain structural constraints needed to be applied in order prevent atomic movement that would otherwise be impossible if the remainder of the proteins structure was imposed. In order to account for this, numerous atoms were kept frozen throughout the optimisations denoted by asterisks in figure S7.

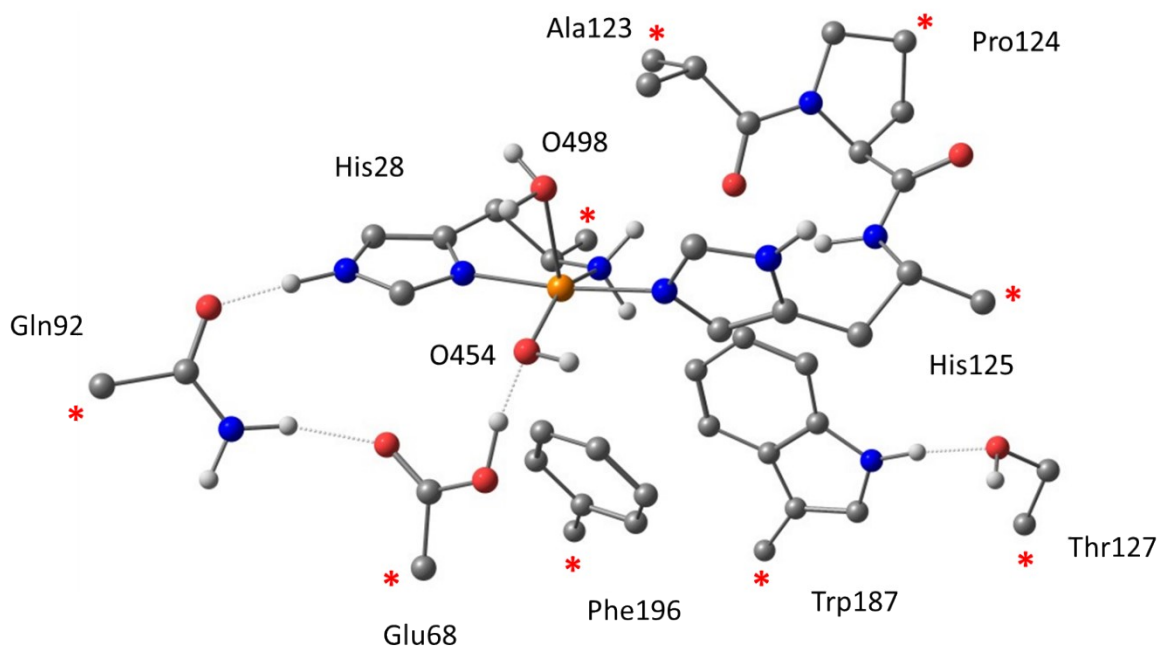

Figure S7. DFT model used to describe species 1. Residue numbers correspond to the labels from the crystal structure (PDB 5IJU) with His28 being the first amino acid in the polypeptide chain. Atoms kept frozen throughout the calculation are denoted by a red asterisk. Hydrogens connected to carbon atoms are omitted from the figure for clarity. Analogous positions were also frozen for models 2 and 3.

Geometry optimisations were performed using ORCA 4.2.0 program at the DFT level of theory. Optimisations of all models were performed using the spin-unrestricted, generalised gradient approximation (GGA) functional uBP86. Ahlrichs's Def-2-TZVP basis set was used to treat the copper and the first coordination sphere nitrogen atoms and oxygen atoms. On all remaining atoms a Def2-SVP basis set was used. Solvation effects were accounted for using the polarizable continuum model with water as the desired solvent (CPCM(water)), as implemented by ORCA 4.2.0. To assess the validity of the optimised geometries, the atomic positions were compared against the crystallographic coordinates, with the copper ion the origin of both models as in figure S8.

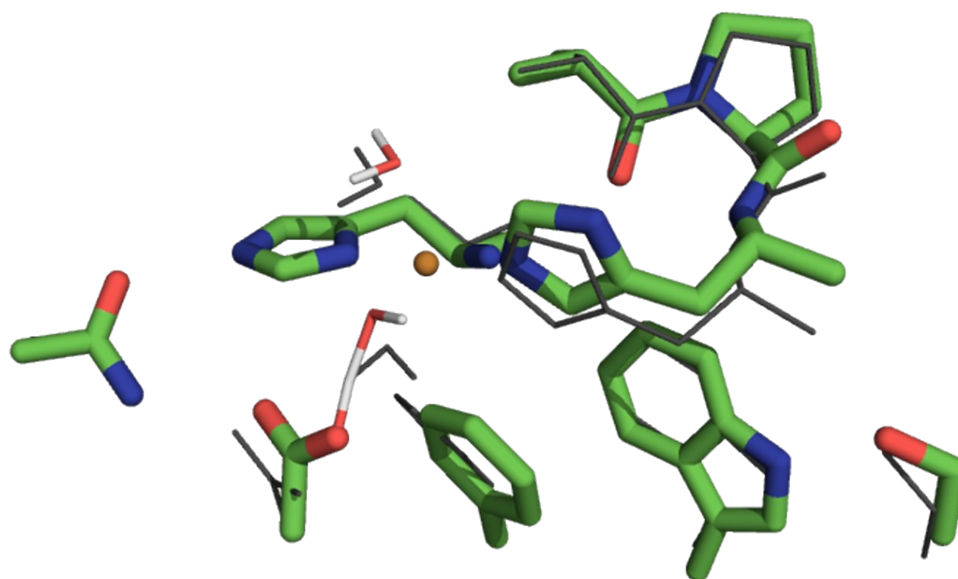

Figure S8. Comparison on the DFT optimised coordinates of model 1 (sticks coloured according to atom type) against the crystallographic coordinates of *BaAA10* (PDB 5IJU) (grey wires). Both models were aligned using the copper ion as the origin.

## DFT EPR property calculations

EPR property calculations were performed on the optimized geometries of **1**, **2** and **3** using the ORCA 4.2.0 program at the DFT level of theory. The cartesian reference system was oriented as such that the NH<sub>2</sub>-Cu(II)-O axis was aligned with the y-axis and the N-Cu(II)-N axis was oriented along x. The integration grid size was kept large (AngularGrid = 7 for all atoms and IntAcc = 7 for the Cu(II) ion) to ensure that the core density was correctly described. Solvation effects were accounted for in the property calculations by implementing the conductor-like polarized continuum model (CPCM) with a dielectric constant of 80.0 and a refractive index of 1.33 (water). The hyperfine coupling calculations included the Fermi-contact, spin dipolar and spin orbit contributions. The hybrid functional, uB3LYP, was used for these calculations with an adjusted fraction (38%) of Hartree-Fock exchange following studies showing improvements in the EPR property calculations.<sup>2</sup> The copper ions were described using the core-property “CP-PPP” basis set having shown good accuracy with EPR calculations on d-block metals.<sup>3</sup> The IGLO-III basis set was applied to all ligating atoms and the ring atoms of the imidazole groups due to increased flexibility in the core region, making it more suited for EPR properties calculations with respect to the Def2-TZVP basis set. All remaining atoms were treated with Ahlrich’s def2-SVP basis set.

**Table S2. EPR spin Hamiltonian parameters derived *via* simulation and DFT for species 1, 2 and 3.**

|                           |         | Species 1  |       | Species 2  |       | Species 3  |       |
|---------------------------|---------|------------|-------|------------|-------|------------|-------|
|                           |         | Simulation | DFT   | Simulation | DFT   | Simulation | DFT   |
| <i>g</i> -factors         | $g_1$   | 2.030      | 2.049 | 2.044      | 2.070 | 2.038      | 2.037 |
|                           | $g_2$   | 2.125      | 2.081 | 2.069      | 2.079 | 2.062      | 2.070 |
|                           | $g_3$   | 2.260      | 2.216 | 2.233      | 2.244 | 2.180      | 2.188 |
| Cu HFC / MHz              | $ A_1 $ | 60         | 110   | 50         | 94    | 70         | 15    |
|                           | $ A_2 $ | 90         | 29    | 66         | 4     | 90         | 140   |
|                           | $A_3$   | -445       | -598  | -554       | -582  | -614       | -496  |
| Principal N<br>SHFC / MHz | N1      | 40         | 36    | N/A        | 1     | 33         | 43    |
|                           | N2      | 40         | 47    | 40         | 40    | 35         | 44    |
|                           | N3      | 32         | 44    | 40         | 40    | 35         | 39    |

## Time Dependent-DFT (TD-DFT)

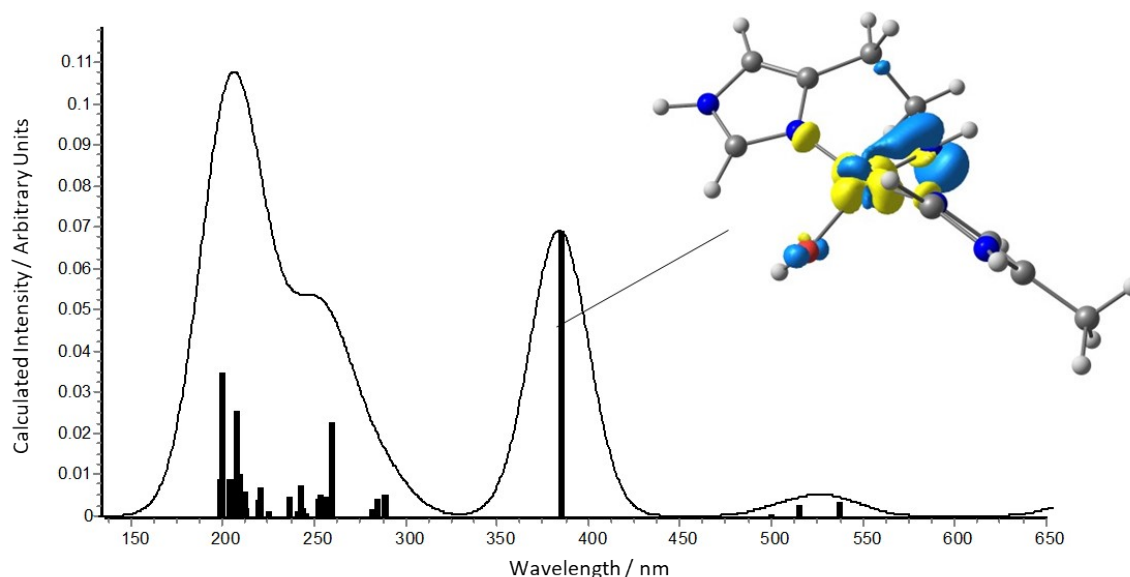

**Figure S9. TD-DFT UV/vis spectrum of truncated model of species 3 and transition density of the proposed LMCT transition from the azanide (blue) to the metal (yellow). Spectrum generated by Gaussian broadening of the TD-DFT vectors.**

A TD-DFT calculation was performed on truncated coordinates of species **3** (model size reduced to lower computational cost) using the hybrid exchange-correlation functional, CAM-B3LYP, to provide more accurate energies of charge transfer excitations in which standard B3LYP significantly underestimates.<sup>4</sup> All atoms were treated with the def2-TZVP basis set with the inclusion of dispersion correction using the D3(BJ) scheme. Solvation effects were modelled using the conductor-like polarisable continuum model (CPCM) using water as the desired solvent. To improve the speed of these calculations, the RIJCOSX approximation was employed with the auxiliary basis set, def2/J. A total of 30 roots were calculated for the spectrum and a Gaussian broadening scheme was applied to produce the calculated spectrum. The vectors calculated at wavelengths < 300 nm showed to be  $\pi$ - $\pi^*$  transitions from the imidazole groups and would be expected to make up part of the large 280 nm absorption band synonymous with a proteins UV-Visible absorption profile. The vectors calculated at wavelengths > 500 nm belonged to d-d transitions (albeit considerably blue shifted). Finally, the vector calculated at 385 nm was considerably more intense than those in the d-d region and the transition density showed that this transition occurs via density from the azanide nitrogen to the copper as a formal LMCT transition (albeit significantly blue-shifted as with the d-d values). These bands appear to be considerably blue shifted compared to the experimental data. However, calculating exact energies with TD-DFT is known to be problematic in open-shell transition metal complexes due to heavy spin contaminations of excited states.<sup>5</sup> Notwithstanding this caveat, however, the calculation does reveal that for the proposed Cu(II)-azanide species that an intense LMCT band is expect to appear between the d-d region and the protein's characteristic band at 280 nm

# DFT cartesian coordinates

## Species 1

Single point energy uB3LYP (38%HFX): -4415.903404286993 Hartree's

|   |              |              |              |    |              |              |              |
|---|--------------|--------------|--------------|----|--------------|--------------|--------------|
| N | 0.000000000  | -2.106299000 | 0.000000000  | C  | -4.177704000 | -0.674004000 | 0.065444000  |
| C | 1.285261000  | -2.847226000 | -0.152034000 | C  | -2.930088000 | -0.819181000 | -0.520022000 |
| C | 1.122078000  | -4.350704000 | 0.041703000  | N  | -3.964911000 | 0.129792000  | 1.174747000  |
| C | 2.336038000  | -2.287052000 | 0.820419000  | C  | -2.648652000 | 0.446659000  | 1.245175000  |
| C | 2.845544000  | -0.947966000 | 0.407208000  | N  | -1.997756000 | -0.113122000 | 0.222818000  |
| C | 4.138269000  | -0.453258000 | 0.327257000  | C  | -8.957055000 | -5.259243000 | -3.500860000 |
| N | 1.982180000  | 0.060670000  | 0.000000000  | C  | -8.595048000 | -5.747141000 | -4.902956000 |
| C | 2.724471000  | 1.133715000  | -0.290291000 | O  | -7.977147000 | -4.360466000 | -2.938994000 |
| N | 4.031509000  | 0.855908000  | -0.104730000 | C  | -3.066742000 | -5.816685000 | -6.614897000 |
| C | 1.631917000  | 1.915757000  | -5.298686000 | C  | -3.756518000 | -5.390754000 | -5.358724000 |
| C | 1.606374000  | 1.912440000  | -3.778504000 | C  | -5.122775000 | -5.268517000 | -5.136719000 |
| O | 2.622213000  | 1.682122000  | -3.103618000 | C  | -3.121457000 | -5.032139000 | -4.114885000 |
| O | 0.413896000  | 2.127533000  | -3.263347000 | C  | -4.166982000 | -4.718600000 | -3.175313000 |
| C | 7.366924000  | 3.807846000  | -2.235129000 | C  | -1.775105000 | -4.921238000 | -3.712727000 |
| C | 6.123790000  | 2.996081000  | -1.944977000 | N  | -5.369813000 | -4.874719000 | -3.830946000 |
| N | 5.285393000  | 2.768311000  | -2.972645000 | C  | -3.880113000 | -4.342045000 | -1.848153000 |
| O | 5.929856000  | 2.577606000  | -0.777208000 | C  | -1.493909000 | -4.497629000 | -2.412103000 |
| C | -1.237577000 | -3.314669000 | 4.017779000  | C  | -2.530154000 | -4.232100000 | -1.478554000 |
| C | -2.326742000 | -3.718388000 | 3.015369000  | C  | 0.654185000  | -3.672477000 | -6.185474000 |
| O | -2.245557000 | -3.386867000 | 1.806101000  | C  | 0.174375000  | -2.654386000 | -5.179963000 |
| C | -0.784796000 | -1.872228000 | 3.752311000  | C  | -1.165963000 | -2.215792000 | -5.164509000 |
| N | -3.370718000 | -4.462920000 | 3.473447000  | C  | 1.061682000  | -2.130257000 | -4.213566000 |
| C | -4.372727000 | -5.030393000 | 2.541718000  | C  | -1.613004000 | -1.286190000 | -4.211669000 |
| C | -5.498029000 | -4.004295000 | 2.244676000  | C  | 0.623948000  | -1.190203000 | -3.268833000 |
| O | -6.558380000 | -3.991514000 | 2.885384000  | C  | -0.717473000 | -0.766831000 | -3.264858000 |
| C | -4.908392000 | -6.251818000 | 3.304949000  | Cu | 0.000000000  | 0.000000000  | 0.000000000  |
| C | -4.868706000 | -5.803219000 | 4.777582000  | O  | -0.062899000 | 1.700025000  | -0.846144000 |
| C | -3.566685000 | -4.974428000 | 4.854900000  | O  | 0.133766000  | 0.900513000  | 2.002794000  |
| N | -5.231319000 | -3.148614000 | 1.218215000  | H  | 0.937252000  | 2.670457000  | -5.713171000 |
| C | -6.157546000 | -2.073320000 | 0.828242000  | H  | 1.286244000  | 0.917746000  | -5.642701000 |
| C | -7.522375000 | -2.600893000 | 0.368845000  | H  | 7.355898000  | 4.711777000  | -1.594650000 |
| C | -5.513642000 | -1.231457000 | -0.291537000 | H  | 7.457620000  | 4.112504000  | -3.294201000 |

|   |              |              |              |   |              |              |              |
|---|--------------|--------------|--------------|---|--------------|--------------|--------------|
| H | 5.501788000  | 3.155806000  | -3.892369000 | H | 2.056037000  | -4.878231000 | -0.237294000 |
| H | 4.381152000  | 2.268454000  | -2.883026000 | H | 3.186700000  | -2.991328000 | 0.887664000  |
| H | -0.029686000 | -1.562411000 | 4.501599000  | H | 1.887069000  | -2.248630000 | 1.839636000  |
| H | -1.634247000 | -1.162349000 | 3.795137000  | H | 5.102806000  | -0.921532000 | 0.546896000  |
| H | -0.325872000 | -1.774204000 | 2.749604000  | H | 2.335610000  | 2.081927000  | -0.660864000 |
| H | -1.667611000 | -3.358953000 | 5.038394000  | H | -4.236695000 | -3.072281000 | 0.949144000  |
| H | -4.224551000 | -7.108200000 | 3.136930000  | H | -6.325517000 | -1.421568000 | 1.717072000  |
| H | -5.920548000 | -6.537875000 | 2.964384000  | H | -8.188473000 | -1.744850000 | 0.140760000  |
| H | -5.743952000 | -5.160508000 | 4.990465000  | H | -6.219383000 | -0.411500000 | -0.542515000 |
| H | -4.859422000 | -6.646591000 | 5.494132000  | H | -5.400639000 | -1.847848000 | -1.205962000 |
| H | -3.635754000 | -4.138403000 | 5.578310000  | H | -2.660073000 | -1.388507000 | -1.414484000 |
| H | -2.702258000 | -5.608840000 | 5.142787000  | H | -4.679722000 | 0.440279000  | 1.838002000  |
| H | -3.864934000 | -5.294688000 | 1.592874000  | H | -2.197250000 | 1.053982000  | 2.033197000  |
| H | -9.018824000 | -6.115604000 | -2.798768000 | H | -0.992232000 | 2.000355000  | -0.826284000 |
| H | -8.447209000 | -4.895176000 | -5.597785000 | H | 0.426401000  | 1.787814000  | 1.706695000  |
| H | -7.674248000 | -6.362188000 | -4.888057000 | H | 0.902548000  | 0.568413000  | 2.507640000  |
| H | -9.415336000 | -6.376732000 | -5.306071000 | H | 0.310483000  | 1.920003000  | -2.186687000 |
| H | -8.111062000 | -3.479499000 | -3.342798000 | H | 4.820253000  | 1.533606000  | -0.351460000 |
| H | -2.382209000 | -5.028729000 | -6.999499000 | H | -6.320622000 | -4.719417000 | -3.431948000 |
| H | -2.439634000 | -6.720426000 | -6.453806000 | H | -3.792661000 | -6.050094000 | -7.418589000 |
| H | -5.951177000 | -5.437580000 | -5.833694000 | H | 1.428961000  | -3.245579000 | -6.857440000 |
| H | -0.959938000 | -5.146987000 | -4.413863000 | H | 8.255801000  | 3.213779000  | -1.943812000 |
| H | -0.443246000 | -4.367808000 | -2.125658000 | H | 2.659130000  | 2.080103000  | -5.669793000 |
| H | -4.683663000 | -4.154429000 | -1.120978000 | H | -9.952172000 | -4.762834000 | -3.503324000 |
| H | -2.285359000 | -3.952182000 | -0.442045000 | H | 0.908759000  | -4.587282000 | 1.103907000  |
| H | 1.118293000  | -4.546685000 | -5.682197000 | H | 0.298392000  | -4.772965000 | -0.559476000 |
| H | -0.176229000 | -4.041652000 | -6.818446000 | C | -0.049322000 | -4.304750000 | 3.955766000  |
| H | -1.875583000 | -2.626351000 | -5.899595000 | H | 0.733518000  | -4.005084000 | 4.679757000  |
| H | 2.112617000  | -2.461984000 | -4.206464000 | H | -0.365215000 | -5.340431000 | 4.192215000  |
| H | -2.666568000 | -0.966990000 | -4.210047000 | H | 0.398585000  | -4.309316000 | 2.942947000  |
| H | 1.335196000  | -0.765472000 | -2.544520000 | H | -0.584157000 | -2.303455000 | -0.822216000 |
| H | -1.045018000 | -0.007958000 | -2.540812000 | H | -7.428870000 | -3.218953000 | -0.548658000 |
| H | -0.554931000 | -2.458342000 | 0.801229000  | H | -7.988307000 | -3.209102000 | 1.164688000  |
| H | 1.624751000  | -2.647667000 | -1.188349000 |   |              |              |              |



## Species 2

Single point energy uB3LYP (38%HFX): -4415.403254849613 Hartree's

|   |              |              |              |    |              |              |              |
|---|--------------|--------------|--------------|----|--------------|--------------|--------------|
| N | 28.395404000 | 2.179706000  | 75.635634000 | C  | 27.478423000 | -1.036725000 | 74.497215000 |
| C | 27.811571000 | 3.496969000  | 76.083355000 | N  | 29.522981000 | -1.834849000 | 74.353654000 |
| C | 28.544004000 | 4.658001000  | 75.421022000 | C  | 29.313074000 | -1.406179000 | 75.625907000 |
| C | 27.877057000 | 3.610779000  | 77.619221000 | N  | 28.076110000 | -0.925080000 | 75.744045000 |
| C | 26.841106000 | 2.891959000  | 78.435160000 | C  | 26.540957000 | 0.049601000  | 66.553510000 |
| C | 25.971636000 | 3.512244000  | 79.320212000 | C  | 25.237999000 | 0.404003000  | 65.839996000 |
| N | 26.586223000 | 1.515216000  | 78.492020000 | O  | 26.347946000 | -0.677501000 | 67.780772000 |
| C | 25.603850000 | 1.335639000  | 79.387336000 | C  | 23.034995000 | 4.172974000  | 69.639914000 |
| N | 25.208756000 | 2.524186000  | 79.900007000 | C  | 24.137895000 | 3.163669000  | 69.751562000 |
| C | 21.657999000 | 0.989999000  | 78.099997000 | C  | 24.189391000 | 1.905975000  | 69.158240000 |
| C | 22.781287000 | 0.111559000  | 78.666636000 | C  | 25.359927000 | 3.287999000  | 70.515736000 |
| O | 22.955070000 | 0.087729000  | 79.929129000 | C  | 26.094261000 | 2.060769000  | 70.343405000 |
| O | 23.481864000 | -0.524468000 | 77.823315000 | C  | 25.900683000 | 4.301478000  | 71.340944000 |
| C | 23.453002000 | 2.661002000  | 84.412001000 | N  | 25.351987000 | 1.243493000  | 69.514896000 |
| C | 23.396775000 | 2.354310000  | 82.921147000 | C  | 27.330557000 | 1.839174000  | 70.982309000 |
| N | 22.892789000 | 1.168528000  | 82.534492000 | C  | 27.126764000 | 4.076978000  | 71.976527000 |
| O | 23.834279000 | 3.197247000  | 82.097541000 | C  | 27.832514000 | 2.855943000  | 71.808236000 |
| C | 32.489747000 | 1.804847000  | 75.165148000 | C  | 22.458000000 | 4.792022000  | 73.872074000 |
| C | 31.675255000 | 1.557910000  | 73.896161000 | C  | 23.282112000 | 3.643830000  | 74.411169000 |
| O | 30.414506000 | 1.557445000  | 73.879677000 | C  | 23.923959000 | 2.736101000  | 73.541217000 |
| C | 32.067780000 | 0.869360000  | 76.301614000 | C  | 23.448963000 | 3.459422000  | 75.802236000 |
| N | 32.378155000 | 1.385363000  | 72.756372000 | C  | 24.713253000 | 1.684059000  | 74.039670000 |
| C | 31.724643000 | 1.364034000  | 71.427906000 | C  | 24.214147000 | 2.396294000  | 76.304581000 |
| C | 31.283034000 | -0.071723000 | 71.054050000 | C  | 24.850022000 | 1.501623000  | 75.426774000 |
| O | 31.999896000 | -0.830925000 | 70.387896000 | Cu | 27.373532000 | -0.073807000 | 77.488236000 |
| C | 32.832591000 | 1.875332000  | 70.498405000 | O  | 26.039517000 | -1.364684000 | 77.732942000 |
| C | 34.104999000 | 1.306000000  | 71.147000000 | O  | 29.157404000 | 0.728152000  | 77.652753000 |
| C | 33.853637000 | 1.457586000  | 72.643923000 | H  | 21.566210000 | 0.876066000  | 77.004209000 |
| N | 30.046874000 | -0.424785000 | 71.503088000 | H  | 21.874603000 | 2.053791000  | 78.333413000 |
| C | 29.526651000 | -1.790111000 | 71.319179000 | H  | 24.516303000 | 2.680652000  | 84.726421000 |
| C | 29.291002000 | -2.135003000 | 69.835995000 | H  | 22.904017000 | 1.927588000  | 85.031403000 |
| C | 28.245528000 | -1.969751000 | 72.154566000 | H  | 22.560320000 | 0.499823000  | 83.230873000 |
| C | 28.378199000 | -1.605172000 | 73.603843000 | H  | 22.845357000 | 0.891254000  | 81.523605000 |

|   |              |              |              |   |              |              |              |
|---|--------------|--------------|--------------|---|--------------|--------------|--------------|
| H | 32.682306000 | 1.073007000  | 77.201581000 | H | 28.017445000 | 5.608303000  | 75.633908000 |
| H | 32.230087000 | -0.191075000 | 76.017772000 | H | 27.762385000 | 4.684833000  | 77.864649000 |
| H | 31.003217000 | 0.989444000  | 76.581409000 | H | 28.906205000 | 3.344725000  | 77.944287000 |
| H | 33.550844000 | 1.593536000  | 74.940841000 | H | 25.849456000 | 4.570279000  | 79.574681000 |
| H | 32.839175000 | 2.984381000  | 70.517349000 | H | 25.129121000 | 0.385284000  | 79.652887000 |
| H | 32.687382000 | 1.539103000  | 69.455253000 | H | 29.638916000 | 0.179986000  | 72.231160000 |
| H | 34.200037000 | 0.236383000  | 70.879374000 | H | 30.303267000 | -2.495578000 | 71.696741000 |
| H | 35.027473000 | 1.829041000  | 70.829644000 | H | 28.988305000 | -3.197899000 | 69.750386000 |
| H | 34.337181000 | 0.660917000  | 73.241403000 | H | 27.935603000 | -3.032530000 | 72.057203000 |
| H | 34.210710000 | 2.440765000  | 73.014921000 | H | 27.419484000 | -1.367878000 | 71.721937000 |
| H | 30.833891000 | 2.022218000  | 71.461282000 | H | 26.444151000 | -0.728851000 | 74.321006000 |
| H | 27.088553000 | 0.970112000  | 66.842448000 | H | 30.388044000 | -2.262549000 | 74.013894000 |
| H | 24.672278000 | -0.510856000 | 65.565065000 | H | 30.062319000 | -1.440198000 | 76.420353000 |
| H | 24.590562000 | 1.039443000  | 66.476992000 | H | 29.152607000 | 1.272858000  | 78.463150000 |
| H | 25.455411000 | 0.960353000  | 64.905187000 | H | 25.127761000 | -0.980657000 | 77.872525000 |
| H | 25.884607000 | -1.514262000 | 67.575312000 | H | 24.513957000 | 2.690804000  | 80.687925000 |
| H | 22.522375000 | 4.336690000  | 70.613517000 | H | 25.690415000 | 0.382006000  | 69.035129000 |
| H | 23.416410000 | 5.165036000  | 69.316621000 | H | 22.266543000 | 3.850630000  | 68.910179000 |
| H | 23.458572000 | 1.422085000  | 68.498050000 | H | 21.691283000 | 5.123910000  | 74.599774000 |
| H | 25.357292000 | 5.247262000  | 71.491094000 | H | 23.042389000 | 3.675027000  | 84.583167000 |
| H | 27.550754000 | 4.863850000  | 72.617706000 | H | 20.690844000 | 0.749236000  | 78.589118000 |
| H | 27.891257000 | 0.905744000  | 70.831282000 | H | 27.208815000 | -0.531015000 | 65.877193000 |
| H | 28.788041000 | 2.701363000  | 72.333118000 | H | 29.580073000 | 4.748419000  | 75.806468000 |
| H | 23.101758000 | 5.670104000  | 73.646515000 | H | 28.594094000 | 4.527621000  | 74.324168000 |
| H | 21.947272000 | 4.516931000  | 72.927033000 | C | 32.394498000 | 3.296120000  | 75.535720000 |
| H | 23.808229000 | 2.848429000  | 72.453431000 | H | 33.028117000 | 3.510175000  | 76.418980000 |
| H | 22.951190000 | 4.149748000  | 76.502727000 | H | 32.728442000 | 3.946734000  | 74.702290000 |
| H | 25.207764000 | 1.002954000  | 73.328386000 | H | 31.352248000 | 3.576718000  | 75.789870000 |
| H | 24.302122000 | 2.242548000  | 77.386927000 | H | 27.683340000 | 1.613456000  | 75.160184000 |
| H | 25.408985000 | 0.650036000  | 75.848803000 | H | 28.487218000 | -1.510256000 | 69.393795000 |
| H | 29.207308000 | 2.225705000  | 74.970940000 | H | 30.224161000 | -1.988242000 | 69.263890000 |
| H | 26.751032000 | 3.492615000  | 75.764815000 | H | 28.775015000 | 1.575655000  | 76.515717000 |

### Species 3

Single point energy uB3LYP (38%HFX): -4414.815119531047 Hartree's

|   |              |              |              |    |              |              |              |
|---|--------------|--------------|--------------|----|--------------|--------------|--------------|
| N | 0.000000000  | -1.938135000 | 0.000000000  | C  | -4.064333000 | -0.154887000 | 0.738706000  |
| C | 1.240492000  | -2.690738000 | -0.046188000 | C  | -2.857416000 | -0.647698000 | 0.265013000  |
| C | 0.991023000  | -4.176505000 | 0.233300000  | N  | -3.721635000 | 0.836122000  | 1.649364000  |
| C | 2.342901000  | -2.132572000 | 0.910903000  | C  | -2.361263000 | 0.935660000  | 1.686066000  |
| C | 2.851549000  | -0.818822000 | 0.415186000  | N  | -1.823280000 | 0.046347000  | 0.859639000  |
| C | 4.143345000  | -0.380175000 | 0.153431000  | C  | -8.817712000 | -4.710922000 | -2.547817000 |
| N | 1.974356000  | 0.176907000  | 0.000000000  | C  | -9.113530000 | -5.117550000 | -3.989370000 |
| C | 2.708427000  | 1.176426000  | -0.500934000 | O  | -8.271811000 | -3.385129000 | -2.426137000 |
| N | 4.024367000  | 0.873710000  | -0.421514000 | C  | -3.732152000 | -5.557309000 | -6.074339000 |
| C | 1.483186000  | 1.913459000  | -5.309096000 | C  | -4.325528000 | -4.899112000 | -4.867840000 |
| C | 1.471590000  | 2.332830000  | -3.824413000 | C  | -5.539046000 | -4.225614000 | -4.769100000 |
| O | 2.591557000  | 2.440757000  | -3.221391000 | C  | -3.729951000 | -4.836900000 | -3.553122000 |
| O | 0.342767000  | 2.510674000  | -3.283615000 | C  | -4.639379000 | -4.111371000 | -2.708250000 |
| C | 7.518436000  | 3.538220000  | -2.703036000 | C  | -2.512845000 | -5.309997000 | -3.012327000 |
| C | 6.140784000  | 2.966173000  | -2.429703000 | N  | -5.724456000 | -3.745451000 | -3.481271000 |
| N | 5.296969000  | 2.849261000  | -3.469503000 | C  | -4.350104000 | -3.861248000 | -1.351963000 |
| O | 5.853123000  | 2.631152000  | -1.253449000 | C  | -2.228093000 | -5.052378000 | -1.668275000 |
| C | -1.038899000 | -2.919202000 | 4.271800000  | C  | -3.129215000 | -4.327946000 | -0.846127000 |
| C | -2.208289000 | -3.341004000 | 3.370546000  | C  | 0.126307000  | -3.627455000 | -5.964013000 |
| O | -2.192215000 | -3.122714000 | 2.140317000  | C  | -0.217743000 | -2.598341000 | -4.912058000 |
| C | -0.553702000 | -1.521896000 | 3.856943000  | C  | -1.560813000 | -2.378786000 | -4.536352000 |
| N | -3.269396000 | -3.969821000 | 3.951323000  | C  | 0.787244000  | -1.839246000 | -4.271768000 |
| C | -4.365981000 | -4.520263000 | 3.121763000  | C  | -1.890265000 | -1.422362000 | -3.562100000 |
| C | -5.463392000 | -3.452215000 | 2.870872000  | C  | 0.459570000  | -0.875940000 | -3.303054000 |
| O | -6.500253000 | -3.408448000 | 3.551128000  | C  | -0.882150000 | -0.658452000 | -2.952457000 |
| C | -4.894465000 | -5.679638000 | 3.975652000  | Cu | 0.000000000  | 0.000000000  | 0.000000000  |
| C | -4.725433000 | -5.152697000 | 5.409803000  | O  | -0.389619000 | 1.874310000  | -0.650852000 |
| C | -3.384013000 | -4.400057000 | 5.362755000  | H  | 0.550030000  | 2.226426000  | -5.817112000 |
| N | -5.207199000 | -2.587642000 | 1.851623000  | H  | 1.536464000  | 0.805043000  | -5.355475000 |
| C | -6.100529000 | -1.457627000 | 1.551199000  | H  | 7.654747000  | 4.444451000  | -2.079134000 |
| C | -7.494176000 | -1.909759000 | 1.102709000  | H  | 7.688901000  | 3.797726000  | -3.765099000 |
| C | -5.465412000 | -0.574275000 | 0.457075000  | H  | 5.604658000  | 3.174431000  | -4.387864000 |

|   |              |              |              |   |              |              |              |
|---|--------------|--------------|--------------|---|--------------|--------------|--------------|
| H | 4.280394000  | 2.581487000  | -3.372037000 | H | 1.924176000  | -4.777454000 | 0.190213000  |
| H | 0.311963000  | -1.215284000 | 4.479204000  | H | 3.195674000  | -2.839555000 | 0.988467000  |
| H | -1.355761000 | -0.765935000 | 3.976918000  | H | 1.898845000  | -2.039668000 | 1.927289000  |
| H | -0.252491000 | -1.509390000 | 2.789921000  | H | 5.116617000  | -0.852523000 | 0.324638000  |
| H | -1.401696000 | -2.869991000 | 5.318372000  | H | 2.324659000  | 2.061717000  | -1.017100000 |
| H | -4.261068000 | -6.574421000 | 3.805384000  | H | -4.230768000 | -2.556788000 | 1.512686000  |
| H | -5.941606000 | -5.933412000 | 3.727808000  | H | -6.210929000 | -0.853866000 | 2.481542000  |
| H | -5.549723000 | -4.450332000 | 5.638364000  | H | -8.143503000 | -1.021101000 | 0.967821000  |
| H | -4.721273000 | -5.952270000 | 6.175375000  | H | -6.121424000 | 0.309448000  | 0.316197000  |
| H | -3.358555000 | -3.530633000 | 6.049707000  | H | -5.472005000 | -1.129619000 | -0.502938000 |
| H | -2.537215000 | -5.069246000 | 5.624819000  | H | -2.654324000 | -1.447706000 | -0.455915000 |
| H | -3.946991000 | -4.842120000 | 2.147539000  | H | -4.375997000 | 1.410045000  | 2.186303000  |
| H | -8.055818000 | -5.383307000 | -2.102617000 | H | -1.812156000 | 1.669356000  | 2.283689000  |
| H | -9.857761000 | -4.434848000 | -4.450964000 | H | 0.054777000  | 2.071978000  | -1.516242000 |
| H | -8.193854000 | -5.104735000 | -4.607739000 | H | 4.786897000  | 1.523657000  | -0.769602000 |
| H | -9.534060000 | -6.143800000 | -4.017907000 | H | -6.632934000 | -3.392624000 | -3.114417000 |
| H | -8.922749000 | -2.750850000 | -2.788232000 | H | -4.390876000 | -5.458577000 | -6.959625000 |
| H | -2.745623000 | -5.117742000 | -6.338835000 | H | -0.420005000 | -3.438614000 | -6.912280000 |
| H | -3.553378000 | -6.641411000 | -5.905637000 | H | 8.281071000  | 2.803349000  | -2.376889000 |
| H | -6.295730000 | -4.042171000 | -5.542418000 | H | 2.365556000  | 2.320166000  | -5.842874000 |
| H | -1.798987000 | -5.861680000 | -3.644161000 | H | -9.736073000 | -4.796326000 | -1.923205000 |
| H | -1.282736000 | -5.410861000 | -1.236253000 | H | 0.537940000  | -4.306988000 | 1.237282000  |
| H | -5.051950000 | -3.317249000 | -0.704895000 | H | 0.274692000  | -4.579903000 | -0.505884000 |
| H | -2.849589000 | -4.106025000 | 0.194539000  | C | 0.102311000  | -3.963466000 | 4.215665000  |
| H | 1.210489000  | -3.633960000 | -6.192105000 | H | 0.922595000  | -3.662257000 | 4.897552000  |
| H | -0.155268000 | -4.651081000 | -5.632752000 | H | -0.246039000 | -4.971966000 | 4.517911000  |
| H | -2.361878000 | -2.970372000 | -5.005889000 | H | 0.512567000  | -4.035397000 | 3.189035000  |
| H | 1.843162000  | -2.004657000 | -4.544836000 | H | -7.452517000 | -2.451052000 | 0.134214000  |
| H | -2.943961000 | -1.285028000 | -3.271573000 | H | -7.952216000 | -2.566013000 | 1.864306000  |
| H | 1.248905000  | -0.289840000 | -2.809556000 | O | 0.644523000  | 3.026240000  | 1.350747000  |
| H | -1.122220000 | 0.112064000  | -2.203728000 | H | 1.280061000  | 2.340145000  | 1.630071000  |
| H | -0.564587000 | -2.291138000 | 0.786724000  | H | 0.217768000  | 2.566455000  | 0.475477000  |
| H | 1.657773000  | -2.596930000 | -1.079636000 |   |              |              |              |

### Truncated Species 3 for TD-DFT

Single point energy uB3LYP (38%HFX): -2341.605057235535 Hartree's

|    |              |              |              |   |              |              |              |
|----|--------------|--------------|--------------|---|--------------|--------------|--------------|
| N  | 0.000000000  | -1.938134958 | 0.000000000  | H | 1.657773148  | -2.596929941 | -1.079635890 |
| C  | 1.240492015  | -2.690738250 | -0.046188178 | H | 3.195674419  | -2.839555064 | 0.988467117  |
| C  | 2.342901048  | -2.132572142 | 0.910902962  | H | 1.898845135  | -2.039668197 | 1.927288941  |
| C  | 2.851549395  | -0.818821887 | 0.415186119  | H | 5.116617466  | -0.852523069 | 0.324638071  |
| C  | 4.143345145  | -0.380175223 | 0.153431239  | H | 2.324659250  | 2.061716896  | -1.017099840 |
| N  | 1.974356083  | 0.176907129  | 0.000000000  | H | -6.121424519 | 0.309448038  | 0.316197165  |
| C  | 2.708427058  | 1.176426113  | -0.500934001 | H | -5.472005498 | -1.129619327 | -0.502937995 |
| N  | 4.024367049  | 0.873710268  | -0.421514021 | H | -2.654323976 | -1.447706184 | -0.455914776 |
| C  | -5.465412479 | -0.574274793 | 0.457075261  | H | -4.375997393 | 1.410045169  | 2.186303213  |
| C  | -4.064333161 | -0.154887006 | 0.738706039  | H | -1.812156376 | 1.669356308  | 2.283689289  |
| C  | -2.857416383 | -0.647698136 | 0.265013025  | H | 0.054777254  | 2.071978172  | -1.516242046 |
| N  | -3.721635328 | 0.836122279  | 1.649363992  | H | 4.786897177  | 1.523656878  | -0.769602053 |
| C  | -2.361262970 | 0.935659990  | 1.686066138  | H | 1.004395352  | -3.702462707 | 0.248891111  |
| N  | -1.823280211 | 0.046346931  | 0.859638916  | H | -5.819682889 | -1.169608194 | 1.285610726  |
| Cu | 0.000000000  | 0.000000000  | 0.000000000  |   |              |              |              |
| O  | -0.389618921 | 1.874310361  | -0.650852032 |   |              |              |              |
| H  | -0.564587145 | -2.291137988 | 0.786724112  |   |              |              |              |

## References

1. R. C. Gregory, G. R. Hemsworth, J. P. Turkenburg, S. J. Hart, P. H. Walton and G. J. Davies, *Dalton Transactions*, 2016, **45**, 16904-16912.
2. F. Neese, *Magnetic Resonance in Chemistry*, 2004, **42**, S187-S198.
3. E. D. Hedegård, J. Kongsted and S. P. A. Sauer, *Physical Chemistry Chemical Physics*, 2012, **14**, 10669-10676.
4. T. Yanai, D. P. Tew and N. C. Handy, *Chemical Physics Letters*, 2004, **393**, 51-57.
5. B. Suo, K. Shen, Z. Li and W. Liu, *The Journal of Physical Chemistry A*, 2017, **121**, 3929-3942.
